# Supplementary material for: Systematic screening of long intergenic noncoding RNAs expressed during chicken embryogenesis
Source: PubMed Central journal article supplement — Poult Sci. 2021 Mar 26;100(7):101160. doi: 10.1016/j.psj.2021.101160 (PMC8170422; doi:10.1016/j.psj.2021.101160), 2021-03-26
Supplement: mmc2.pdf [file mmc2.pdf]

Table s1 qRT-PCR primers

| <b>Gene</b>                     | <b>ID</b>   | <b>Primer sequence (5'-3')</b>                       | <b>Product size</b> |
|---------------------------------|-------------|------------------------------------------------------|---------------------|
| <i>linc5006</i>                 | PB.5006.1   | F: GCTCTCGTAGCCAGTGAGAC<br>R: AGCAGCTAGATGGGGGTACA   | 228                 |
| <i>linc6166</i>                 | PB.6166.1   | F: CCATCCTGTAAGTGATGGAGGA<br>R: CAAGACAGCACTGAGGGGTC | 263                 |
| <i>linc6405</i>                 | PB.6405.3   | F: GCCTGTTTAGCATAGGCGGT<br>R: TTGCTCCTGCTCACTGATGG   | 293                 |
| <i>linc13589</i>                | PB.13589.1  | F: TGCTTTAGGCTAGGAACCGC<br>R: TGAGTCGAGCCACTGTAAGC   | 223                 |
| <i><math>\beta</math>-actin</i> | NM_205518.1 | F: GAGAGAAGATGACACAGATC<br>R: GTCCATCACAATACCAGTGG   | 116                 |
